# Supplementary material for: Treating patients with opioid overdose at a primary care emergency outpatient clinic: a cost-minimization analysis
Source: PubMed Central journal article supplement (PMC8335998; doi:10.1186/s12962-021-00303-6), 2021-08-04
Supplement: 12962_2021_303_MOESM3_ESM.pdf [file 12962_2021_303_MOESM3_ESM.pdf]

**Supplementary figure 2. Decision tree at hospital**

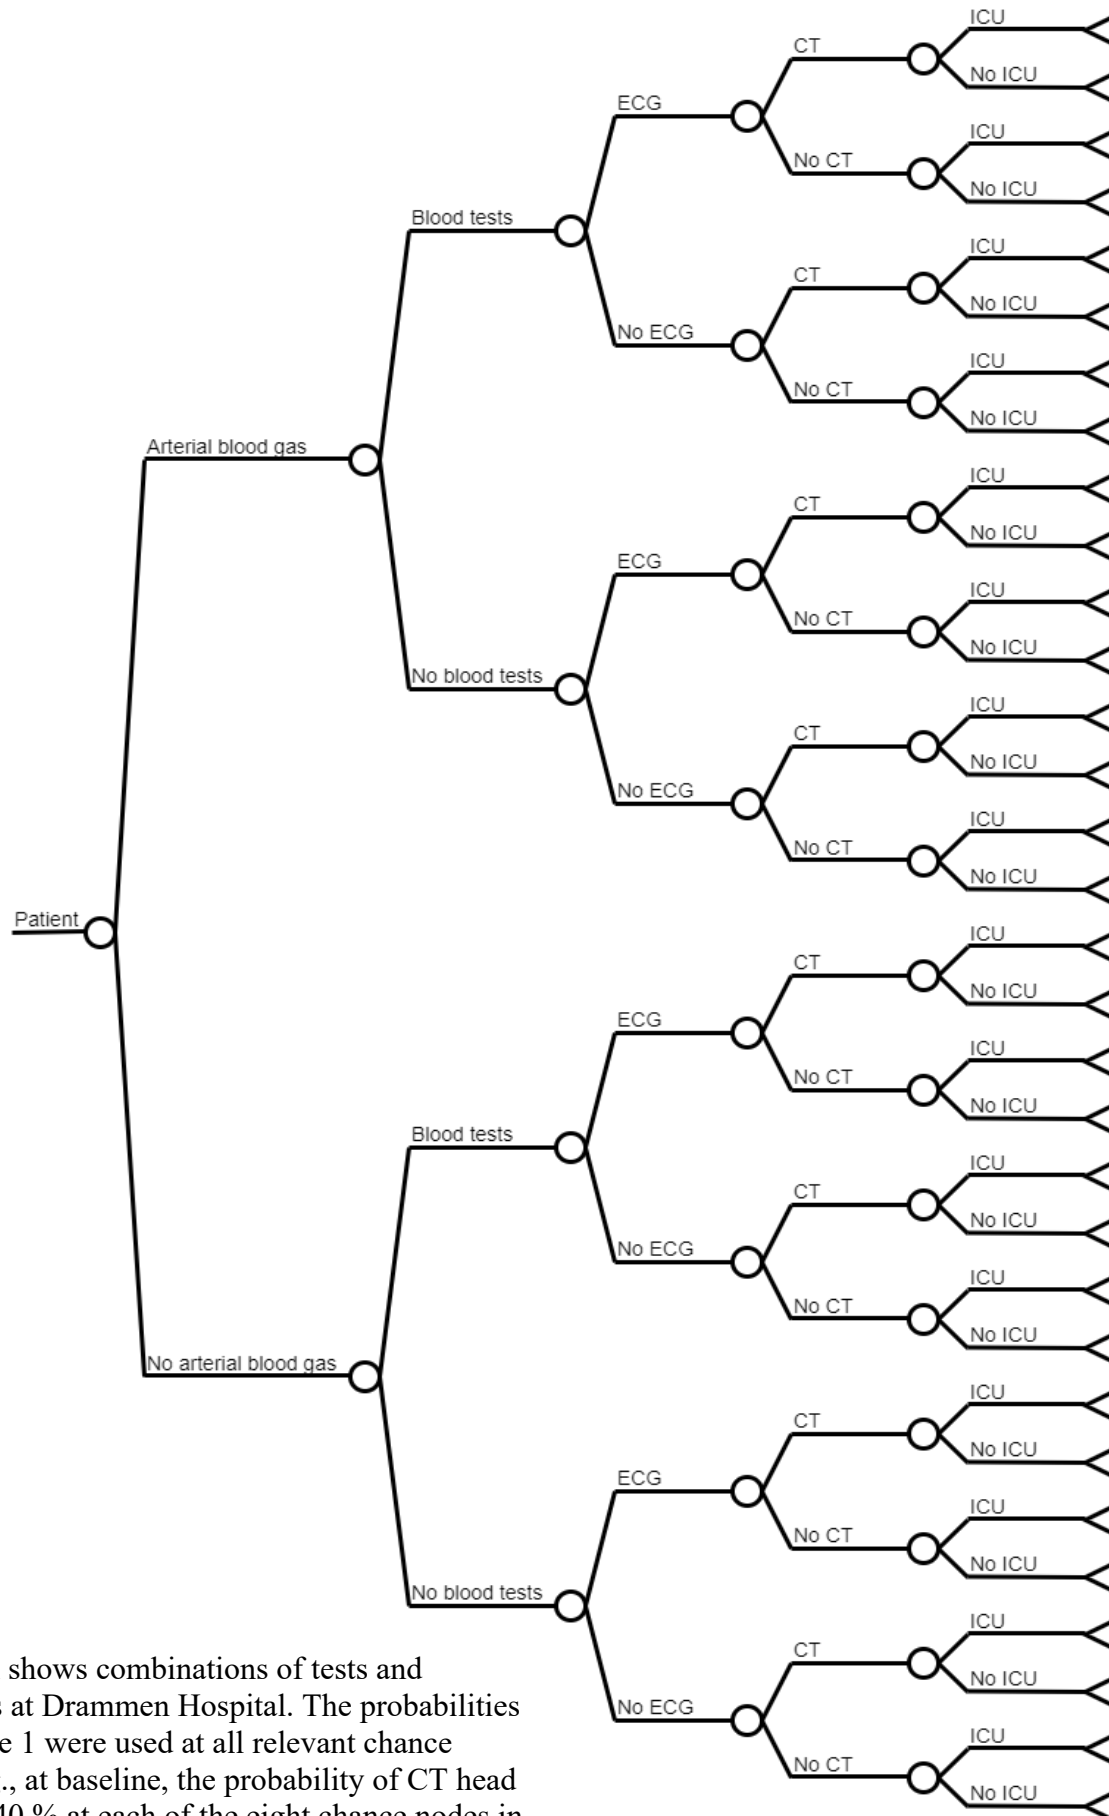

The graph shows combinations of tests and treatments at Drammen Hospital. The probabilities from Table 1 were used at all relevant chance nodes (e.g., at baseline, the probability of CT head scan was 40 % at each of the eight chance nodes in the figure).

Naloxone, flumazenil, and Ringer acetate (Table 1) were excluded from the graph but included in the calculations.
